# Supplementary material for: A versatile post-synthetic method on a solid support for the synthesis of RNA containing reduction-responsive modifications
Source: Royal Society of Chemistry journal article supplement (doi:10.1039/c6ob01272h), 2016-01-01
Supplement: c6ob01272h1.pdf [file c6ob01272h1.pdf]

Supplementary Information

**A versatile post-synthetic method on solid support for the synthesis of  
RNA containing reduction-responsive modifications**

**Annabelle Biscans, Sonia Rouanet, Jean-Jacques Vasseur, Christelle Dupouy\* and  
Françoise Debart\***

**Contents**

- S2 **Figure S1**  $^{31}\text{P}$ -NMR spectrum of uridine 3'-phosphoramidite **1**
- S3-S11 **Figures S2-S8**  $^1\text{H}$ -NMR and  $^{13}\text{C}$ -NMR spectra of alkyldisulfanyl-pyridine reagents **2a-g**
- S12-S18 **Figures S9-S15** HPLC traces and MALDI-TOF MS spectra of RNAs **4a-g**
- S19 **Figure S16** Melting curves of RNAs **4a-g** with their complementary strand
- S19 **Figure S17** CD spectroscopy curves of RNAs **4a-g** with their complementary strand
- S20-S21 **Figure S18** MALDI-TOF MS spectra of RNAs **3** and **4a-g** incubated with SVPDE
- S22 **Figure S19** IEX-HPLC and MALDI-TOF MS spectra of reductive conversion of RNAs **4a-g** into unmodified RNA **3** under glutathione treatment
- S23-24 **Figure S20** IEX-HPLC and MALDI-TOF MS spectra of reductive conversion of RNAs **4a-g** with their complementary strand into unmodified duplex under glutathione treatment
- S24 **Table S1** Purity of the product 2'OH RNAs duplex after reductive conversion of RNAs **4a-g** with their complementary strand into unmodified duplex after 1h incubation with 5.6 mM glutathione

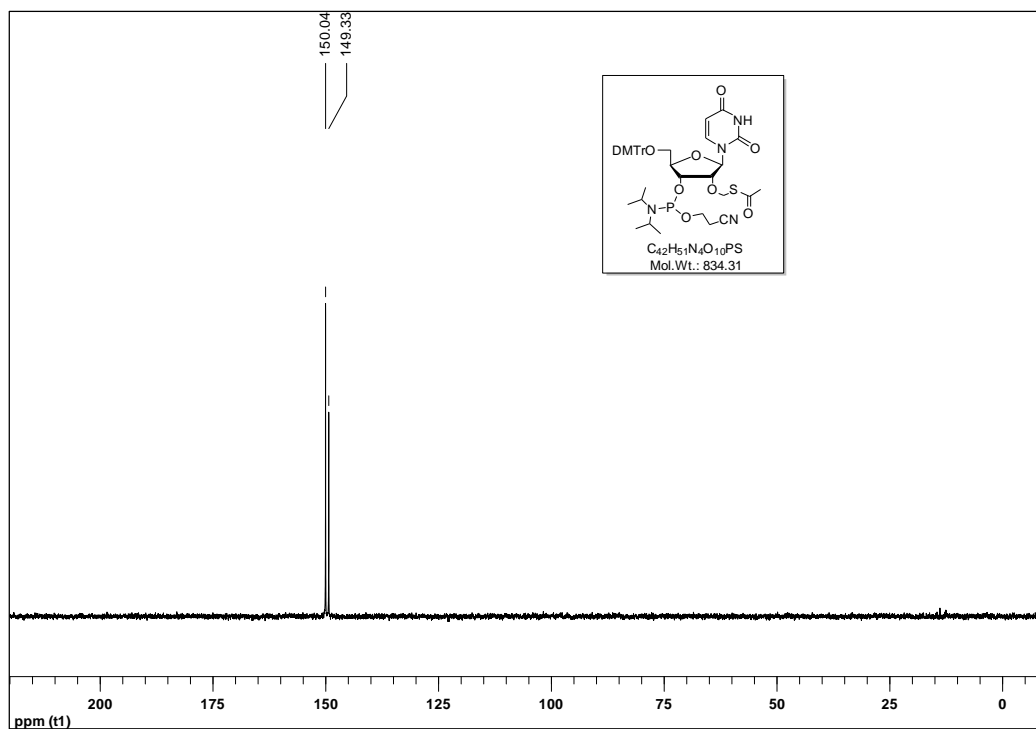

**Figure S1:** 121 MHz  $^{31}\text{P}$ -NMR spectrum ( $\text{CD}_3\text{CN}$ ) of 2'-O-AcSM uridine phosphoramidite **1**

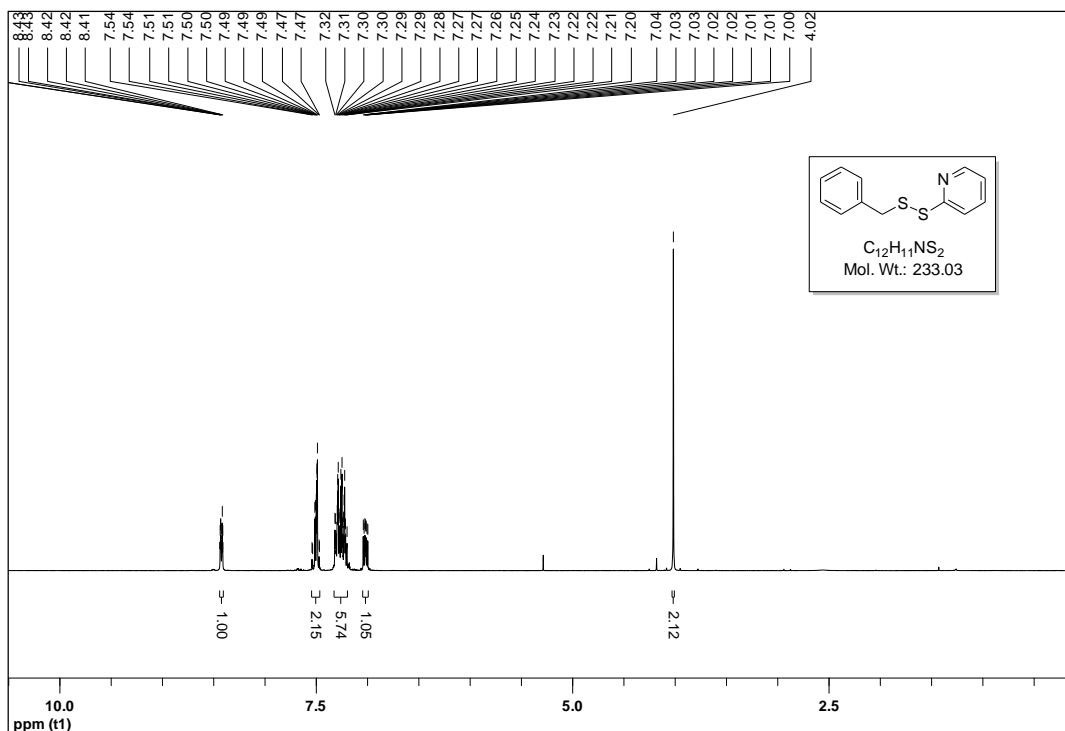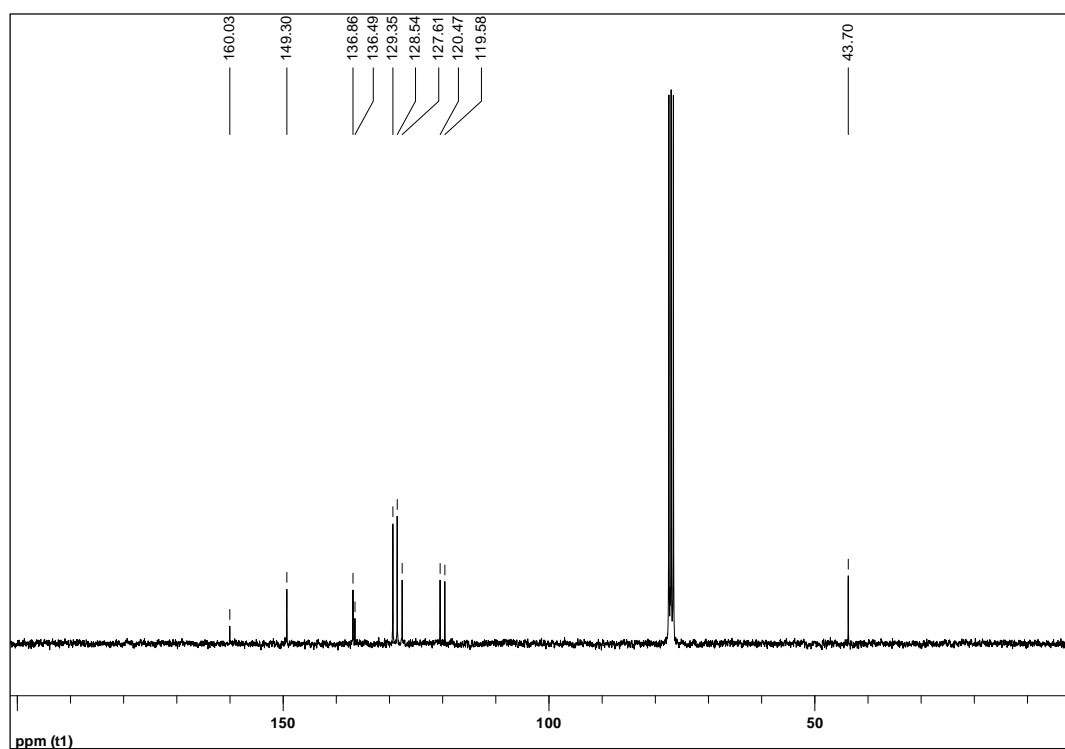

Figure S2: 300 MHz  $^1H$ -NMR and 75 MHz  $^{13}C$ -NMR spectra ( $CDCl_3$ ) of **2a**

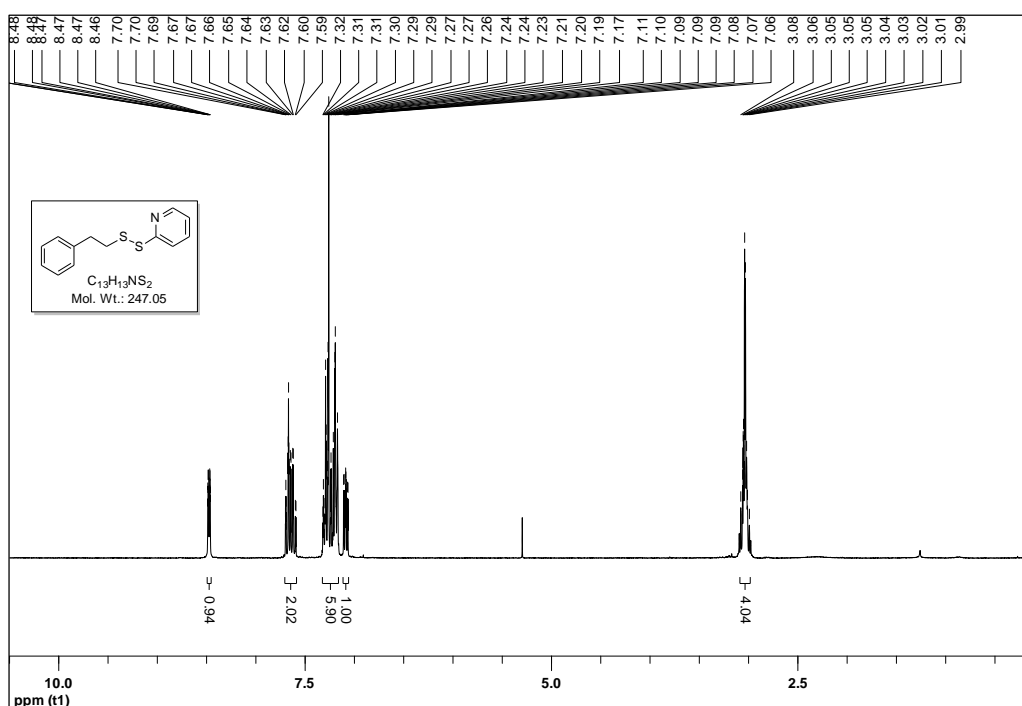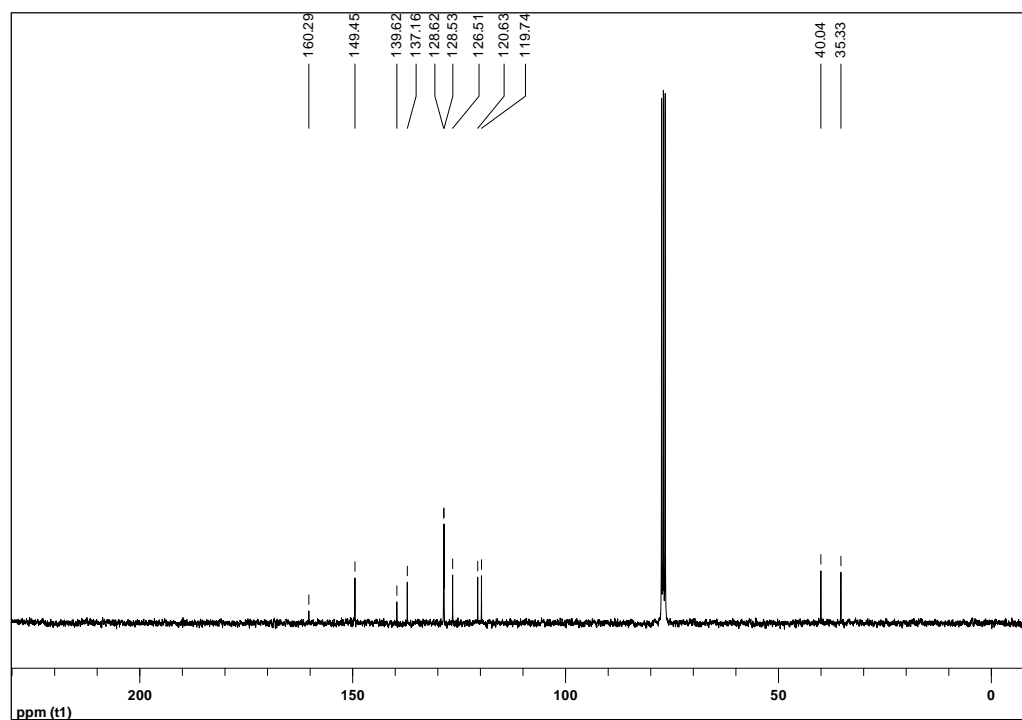

**Figure S3:** 300 MHz  $^1H$ -NMR and 75 MHz  $^{13}C$ -NMR spectra ( $CDCl_3$ ) of **2b**

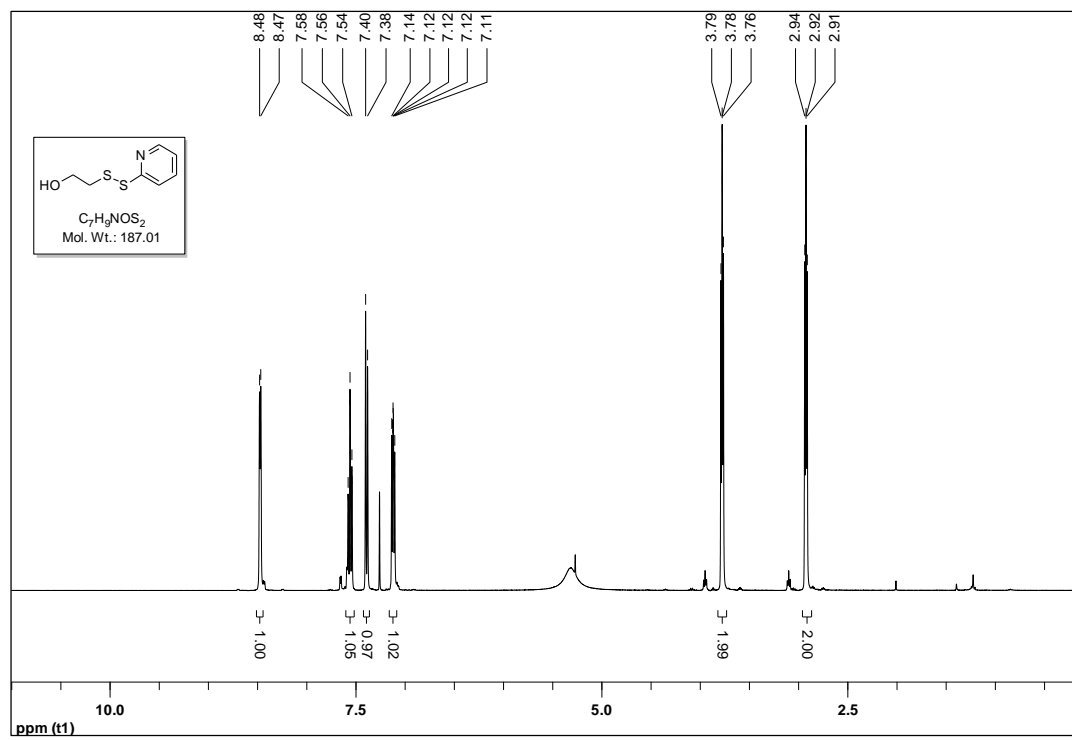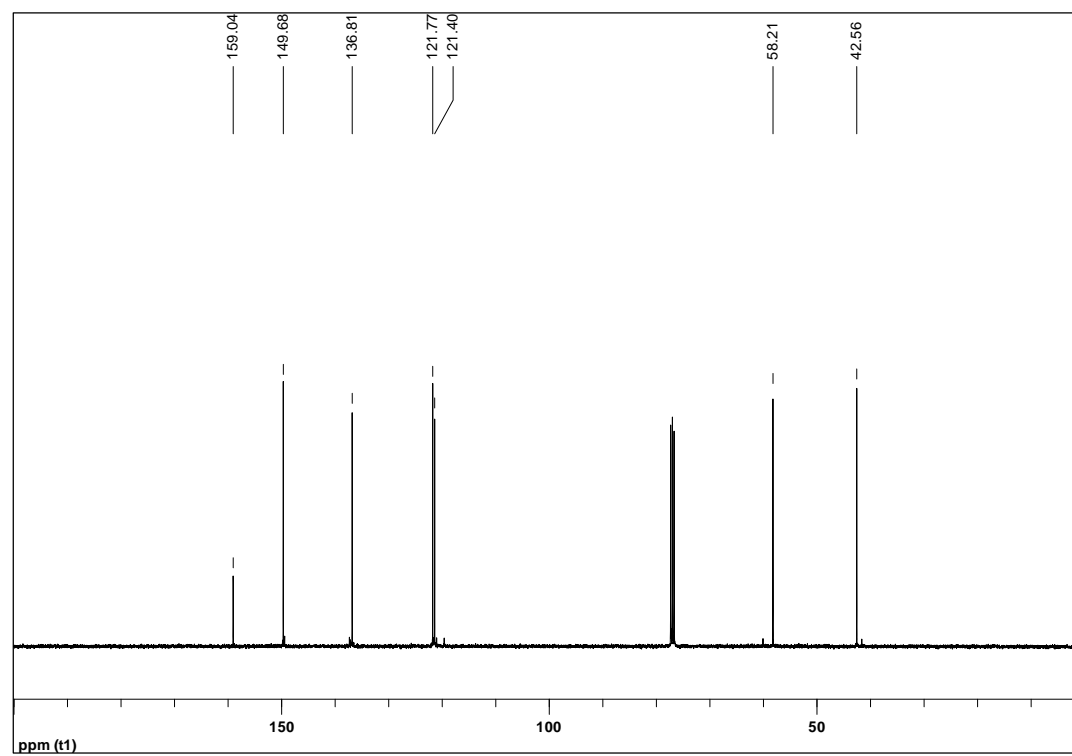

**Figure S4:** 400 MHz  $^1\text{H}$ -NMR and 100 MHz  $^{13}\text{C}$ -NMR spectra ( $\text{CDCl}_3$ ) of **2c**

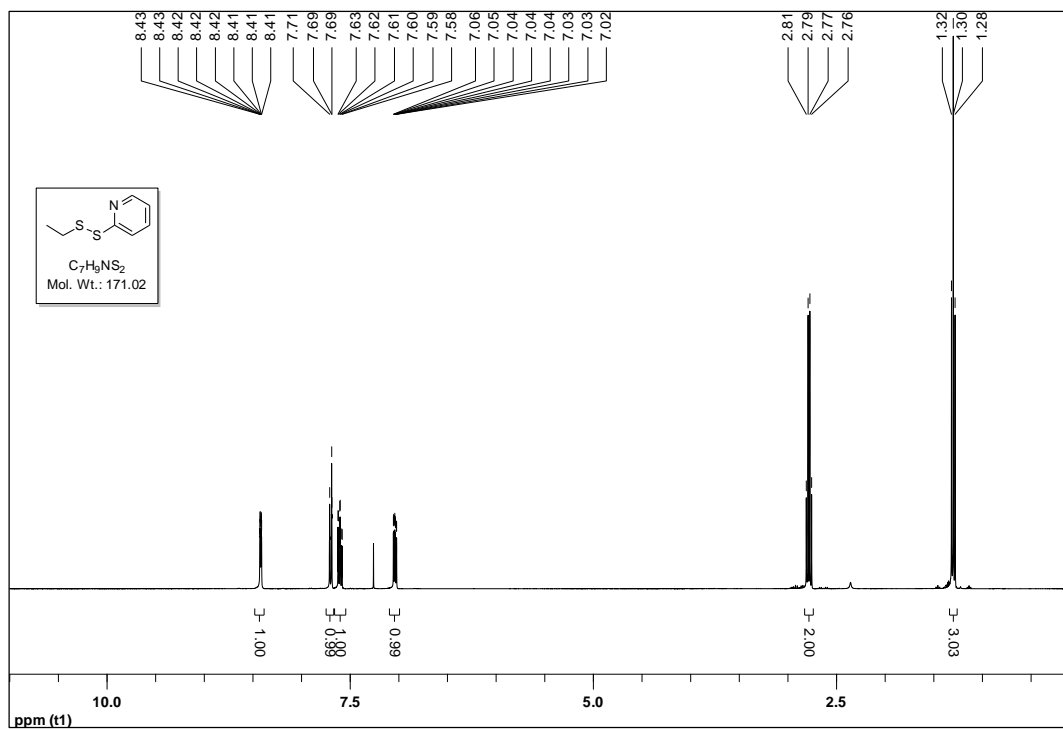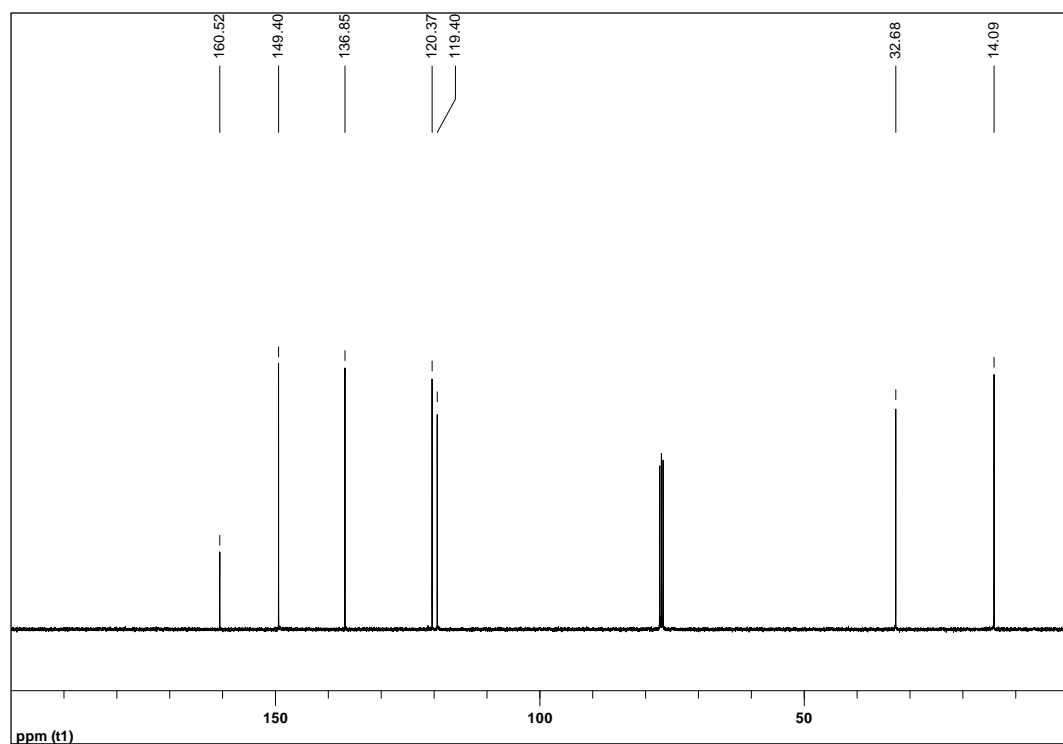

**Figure S5:** 400 MHz <sup>1</sup>H-NMR and 100 MHz <sup>13</sup>C-NMR spectra (CDCl<sub>3</sub>) of **2d**

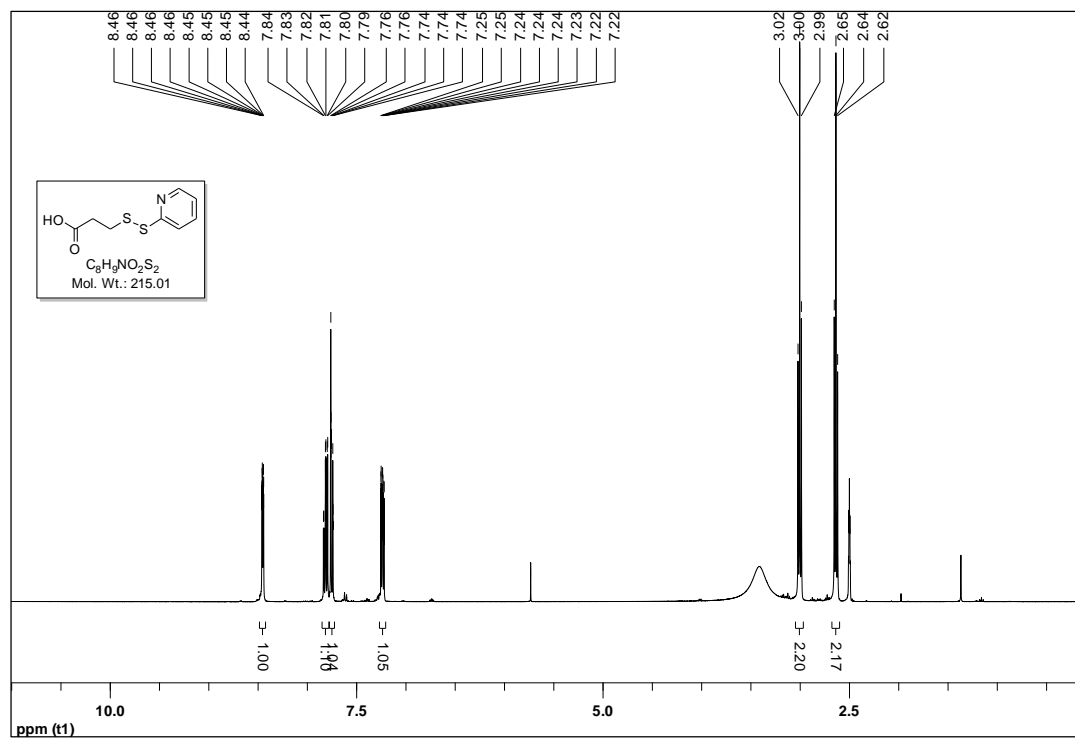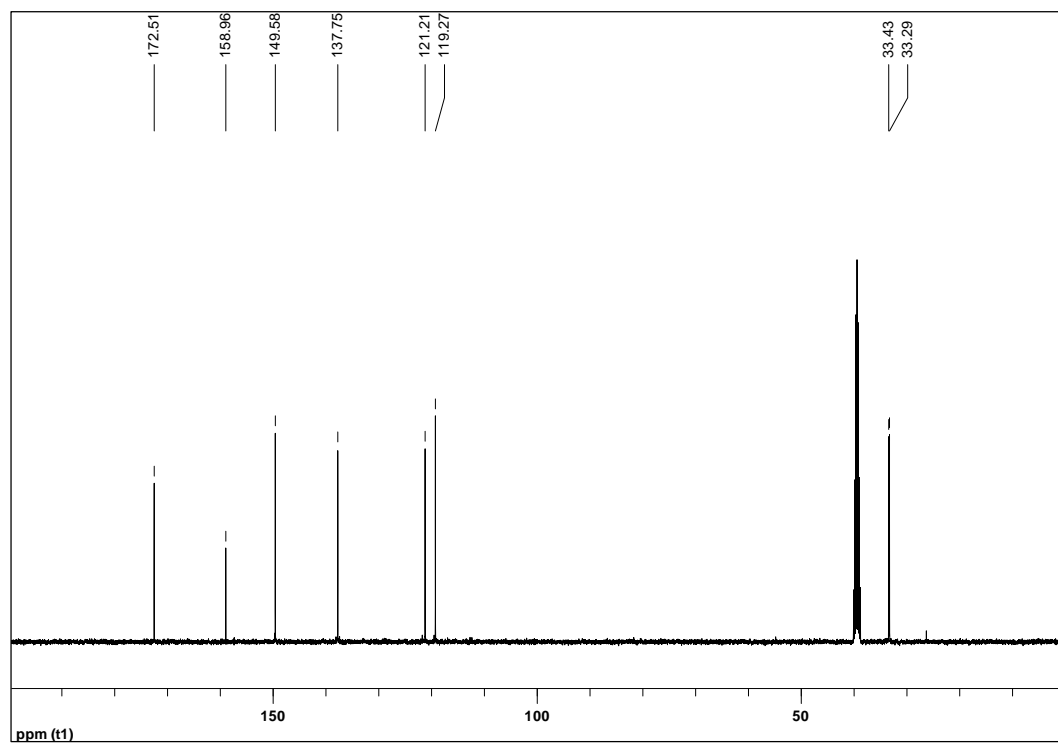

**Figure S6:** 400 MHz  $^1H$ -NMR and 100 MHz  $^{13}C$ -NMR spectra (DMSO- $d_6$ ) of **2e**

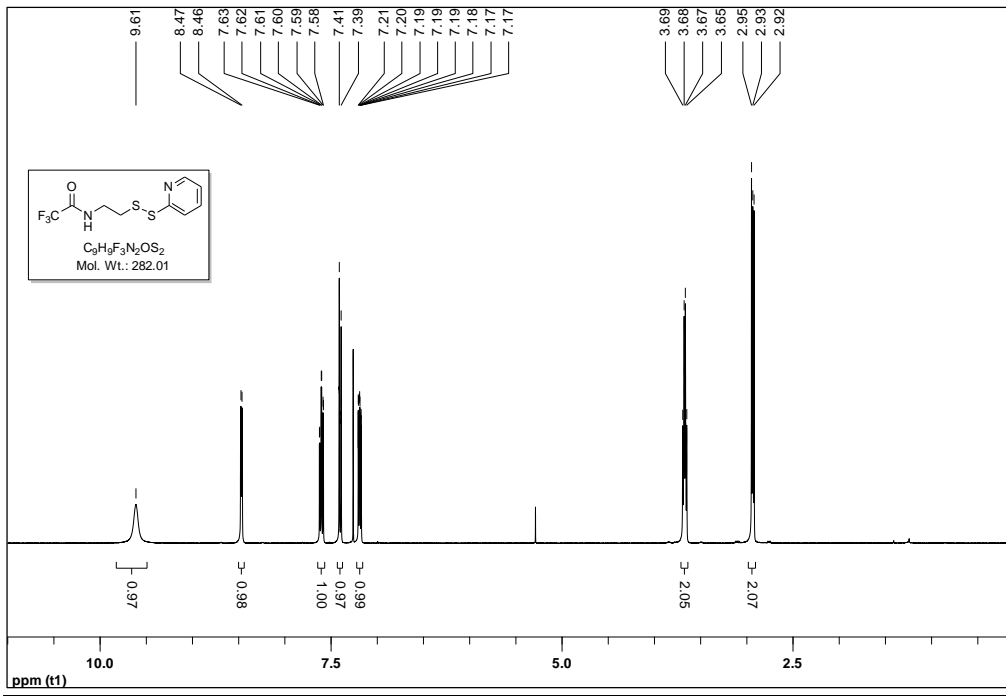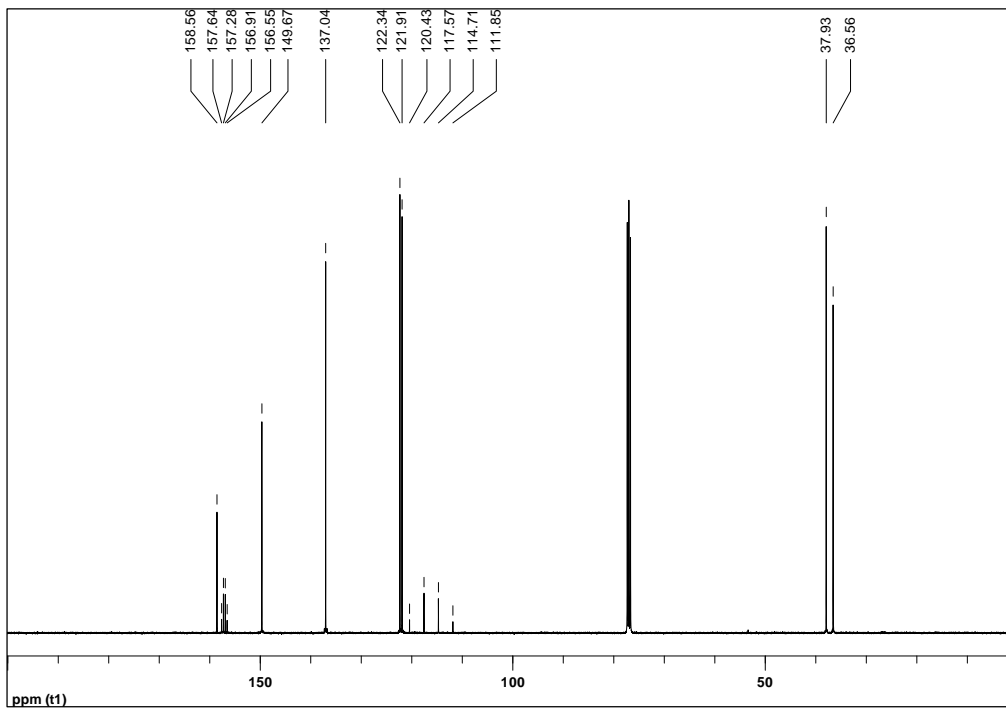



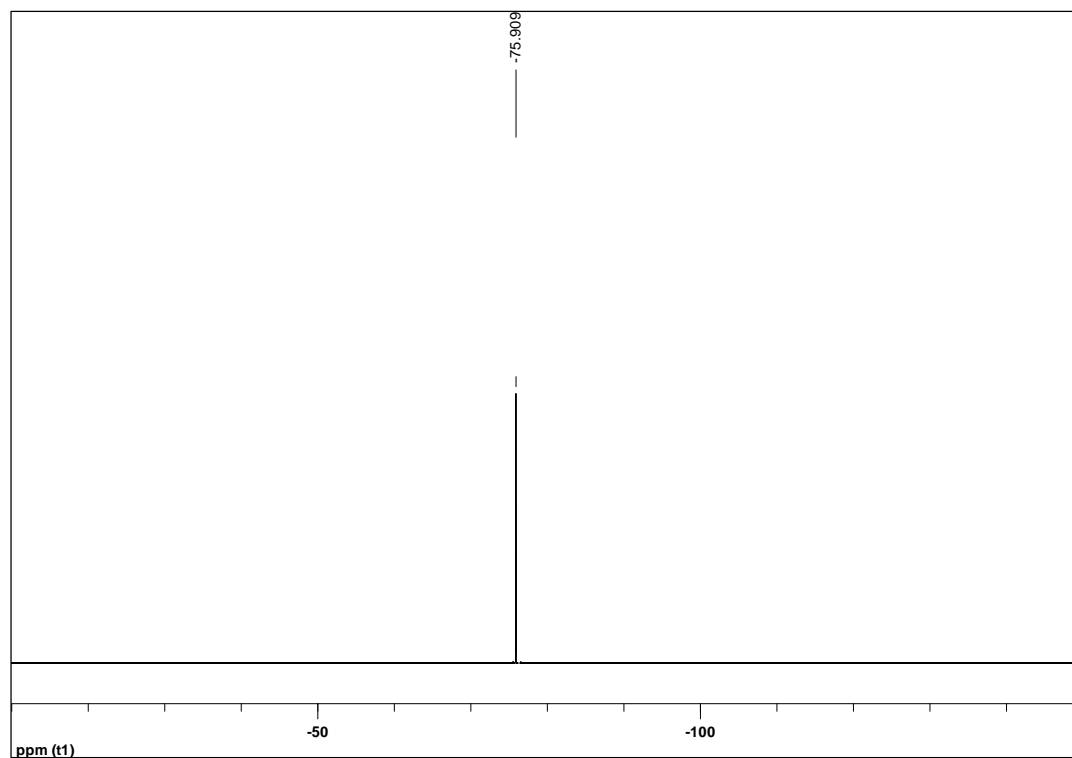

**Figure S7:** 400 MHz  $^1\text{H}$ -NMR, 100 MHz  $^{13}\text{C}$ -NMR and 160 MHz  $^{19}\text{F}$ -NMR spectra ( $\text{CDCl}_3$ ) of **2f**

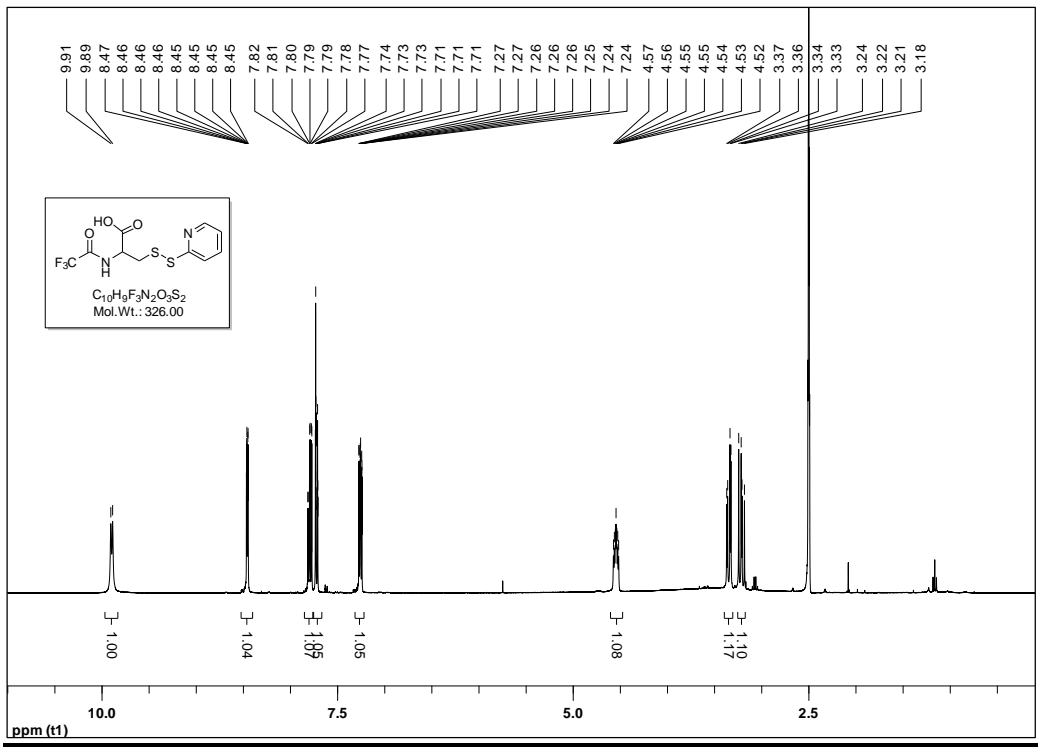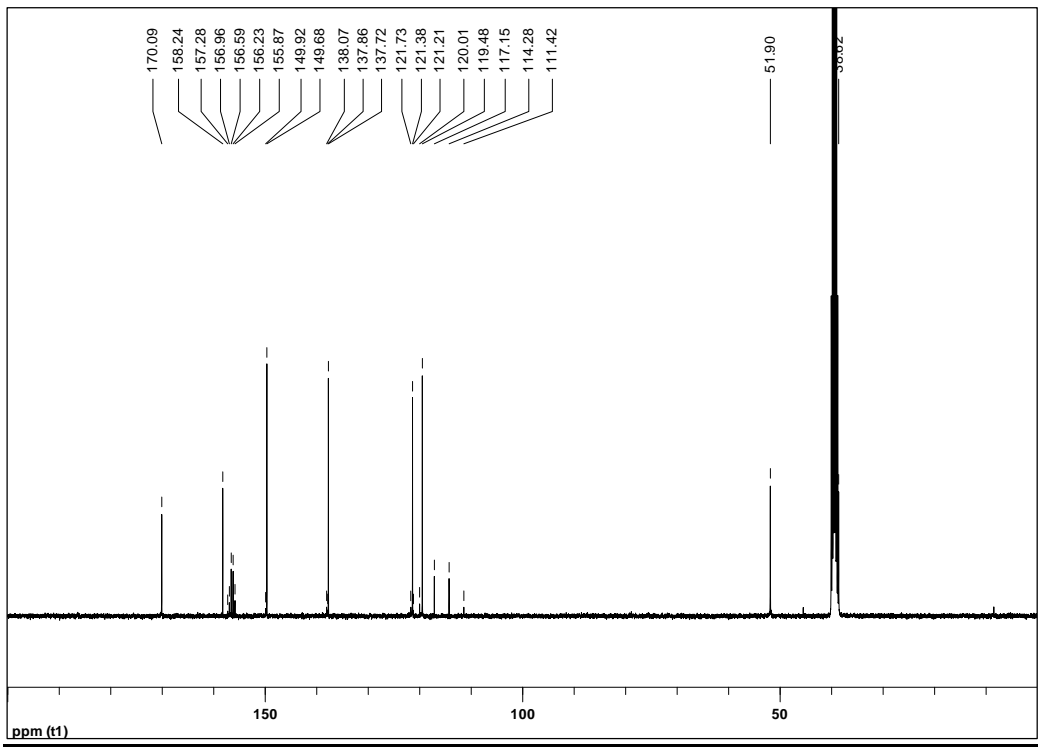

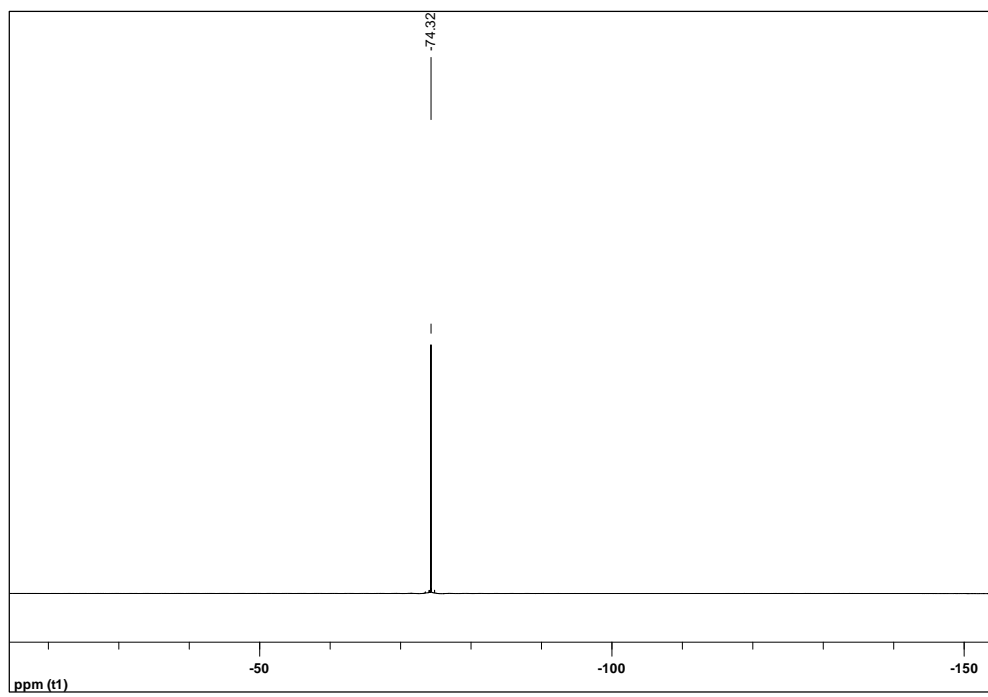

**Figure S8:** 400 MHz  $^1\text{H}$ -NMR, 100 MHz  $^{13}\text{C}$ -NMR and 160 MHz  $^{19}\text{F}$ -NMR spectra (DMSO- $\text{d}_6$ ) of **2g**

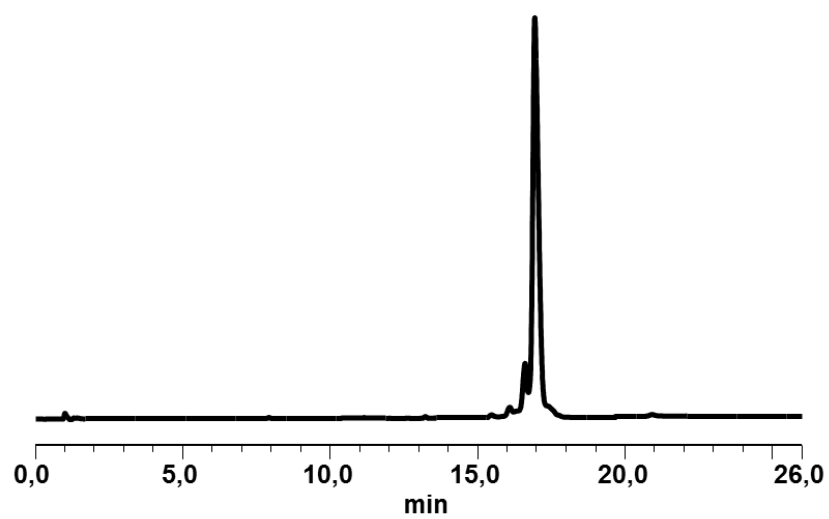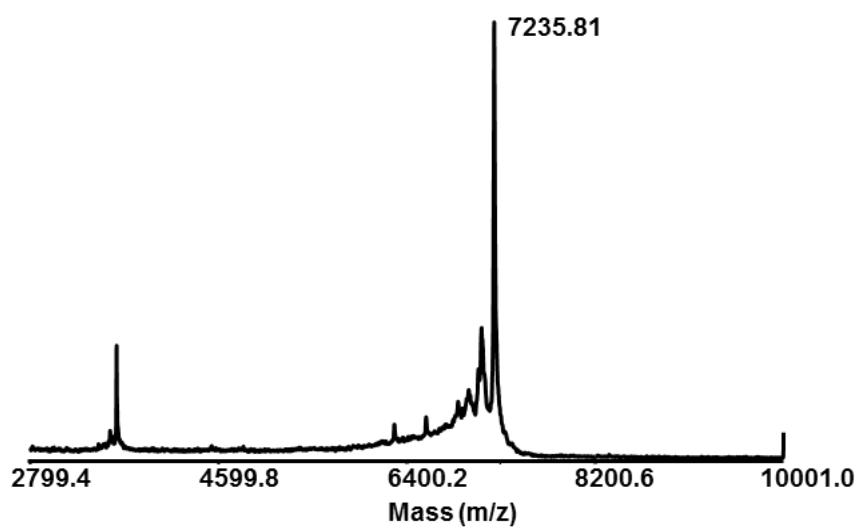

**Figure S9:** IEX-HPLC and MALDI-TOF MS analysis of purified RNA **4a**

*IEX-HPLC analysis conditions: DNAPac® PA100, 4X250 mm, elution with a 20 min linear gradient of 30 to 100% of B in eluent A. Column temperature 75°C. Flow rate 1.5 mL.min<sup>-1</sup>. λ 260 nm.*

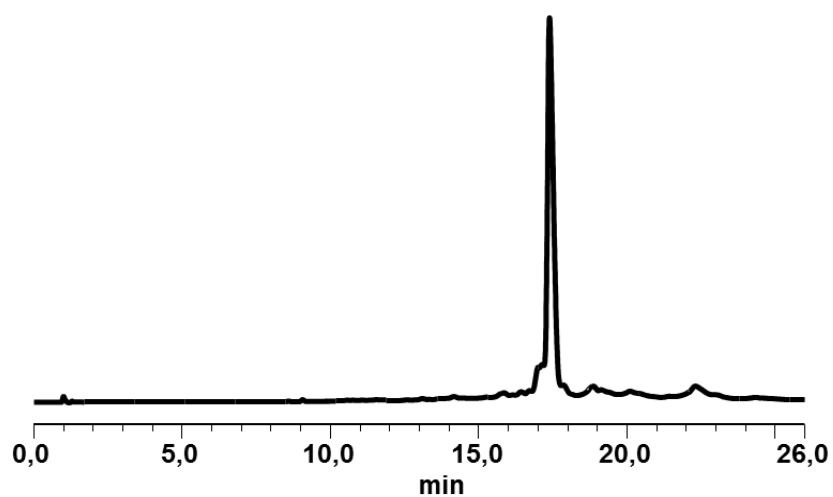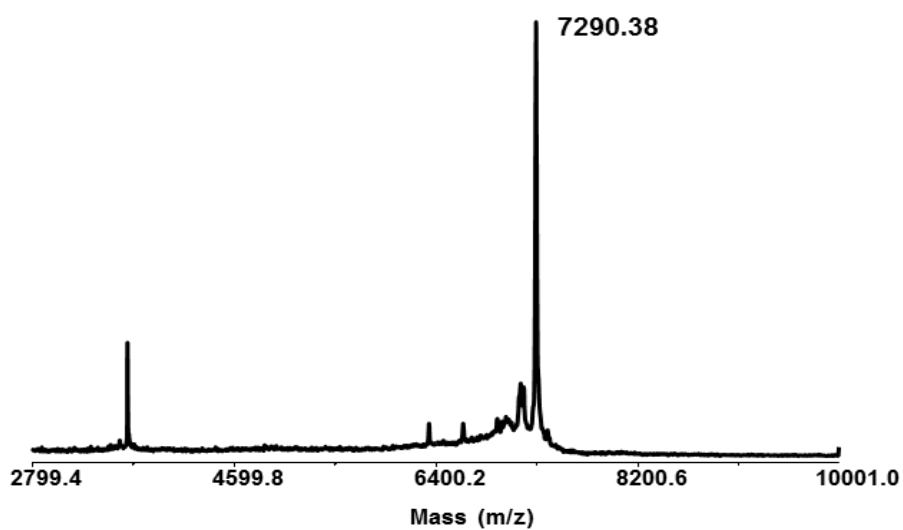

**Figure S10:** IEX-HPLC and MALDI-TOF MS analysis of purified RNA **4b**

*IEX-HPLC analysis conditions: DNAPac® PA100, 4X250 mm, elution with a 20 min linear gradient of 30 to 100% of B in eluent A. Column temperature 75°C. Flow rate 1.5 mL.min<sup>-1</sup>. λ 260 nm.*

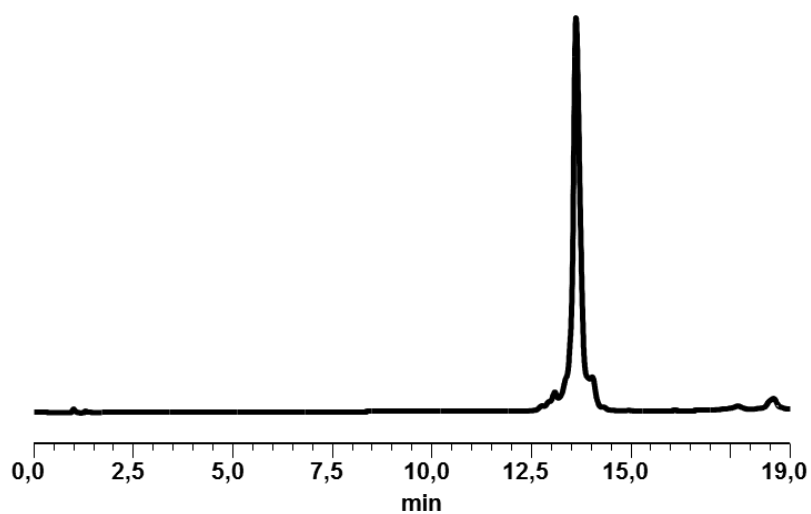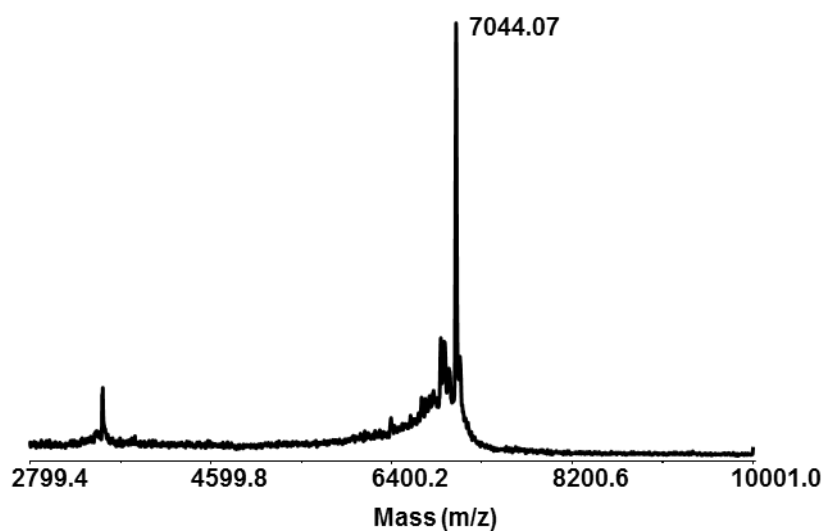

**Figure S11:** IEX-HPLC and MALDI-TOF MS analysis of purified RNA **4c**

*IEX-HPLC analysis conditions: DNAPac® PA100, 4X250 mm, elution with a 20 min linear gradient of 30 to 100% of B in eluent A. Column temperature 75°C. Flow rate 1.5 mL.min<sup>-1</sup>. λ 260 nm.*

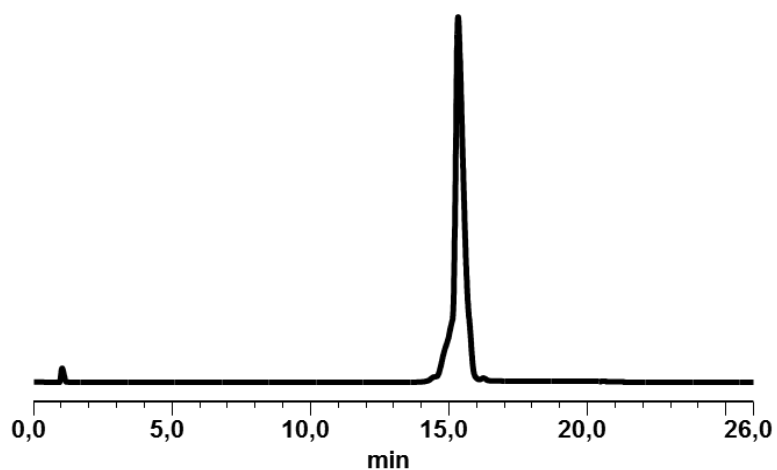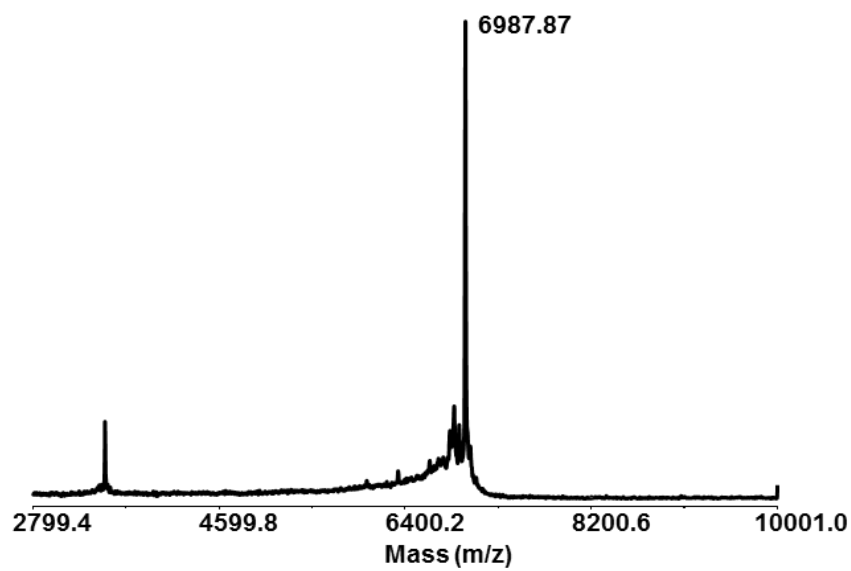

**Figure S12:** IEX-HPLC and MALDI-TOF MS analysis of purified RNA **4d**

*IEX-HPLC analysis conditions: DNAPac® PA100, 4X250 mm, elution with a 20 min linear gradient of 30 to 100% of B in eluent A. Column temperature 75°C. Flow rate 1.5 mL.min<sup>-1</sup>. λ 260 nm.*

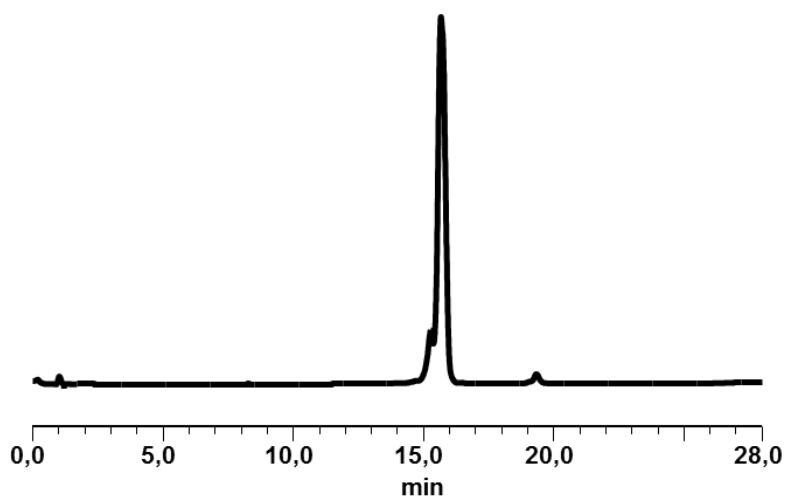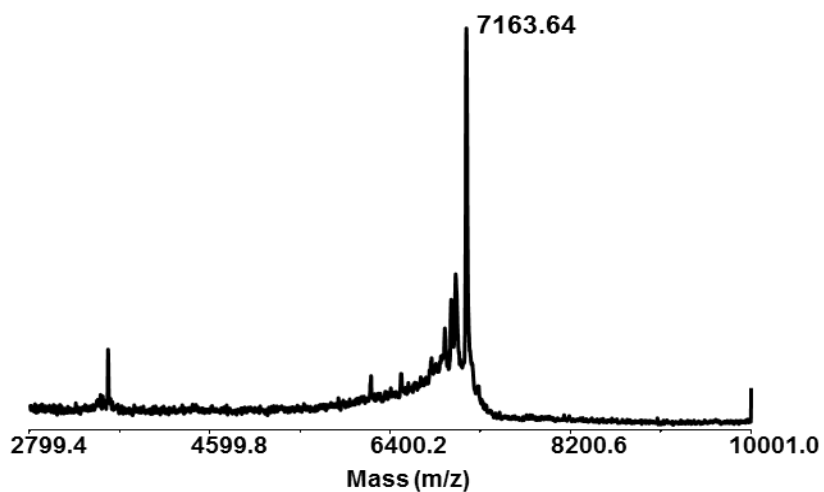

**Figure S13:** IEX-HPLC and MALDI-TOF MS analysis of purified RNA **4e**

*IEX-HPLC analysis conditions: DNAPac® PA100, 4X250 mm, elution with a 20 min linear gradient of 30 to 100% of B in eluent A. Column temperature 75°C. Flow rate 1.5 mL.min<sup>-1</sup>. λ 260 nm.*



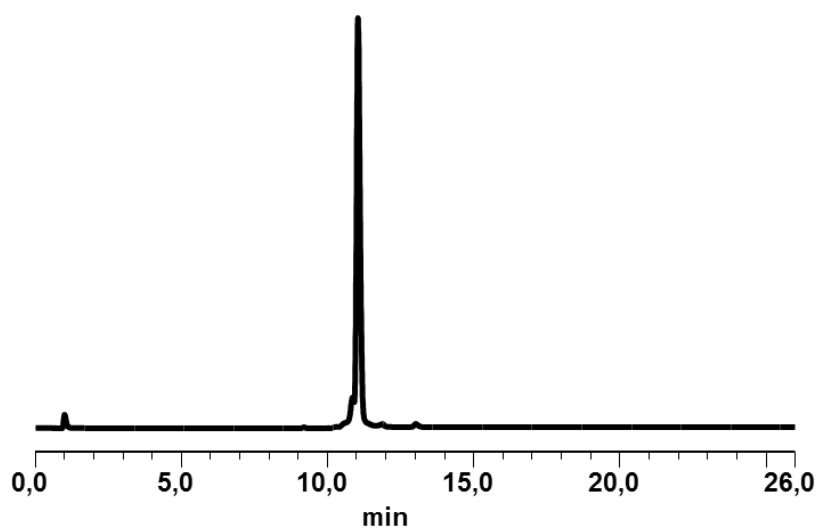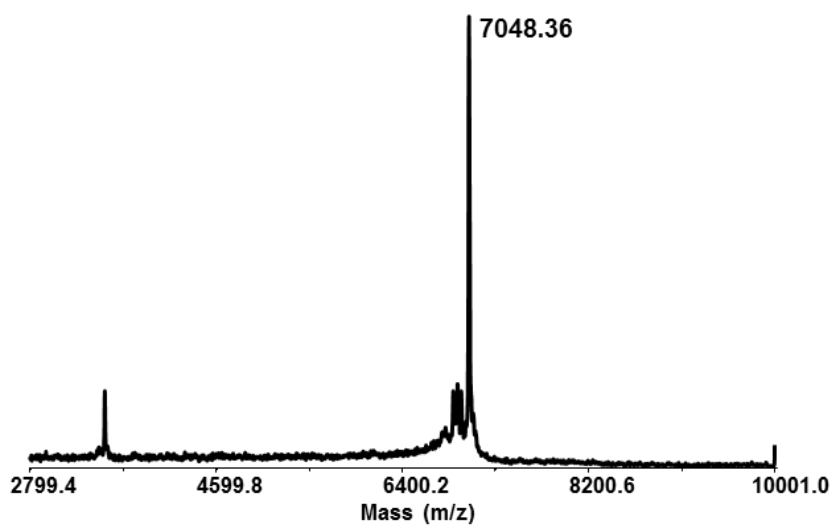

**Figure S14:** IEX-HPLC and MALDI-TOF MS analysis of purified RNA **4f**

*IEX-HPLC analysis conditions: DNAPac® PA100, 4X250 mm, elution with a 20 min linear gradient of 30 to 100% of B in eluent A. Column temperature 75°C. Flow rate 1.5 mL.min<sup>-1</sup>. λ 260 nm.*

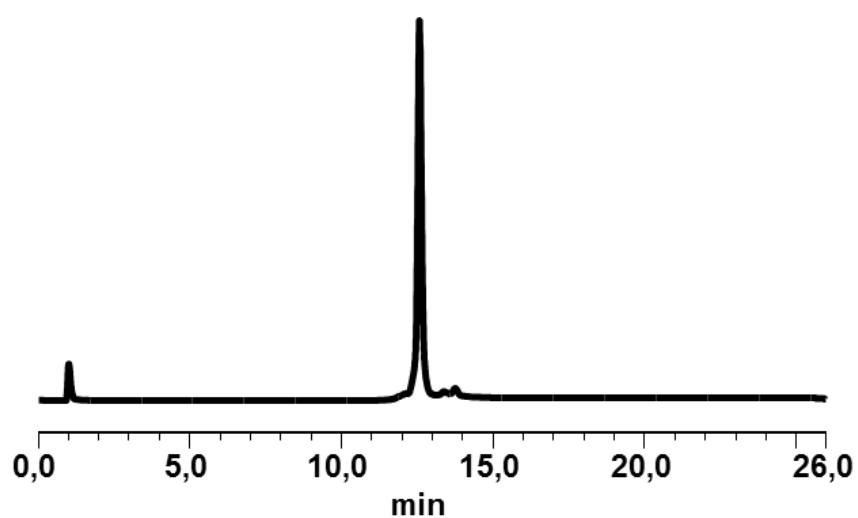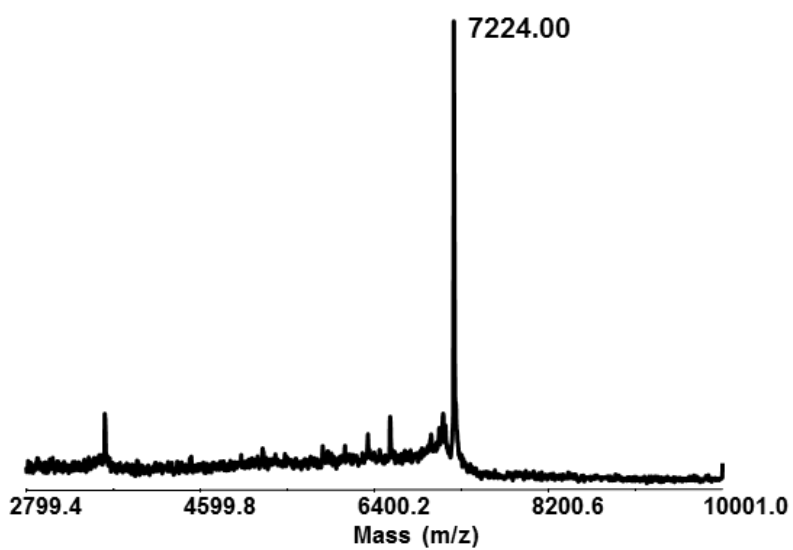

**Figure S15:** IEX-HPLC and MALDI-TOF MS analysis of purified RNA **4g**

*IEX-HPLC analysis conditions: DNAPac® PA100, 4X250 mm, elution with a 20 min linear gradient of 30 to 100% of B in eluent A. Column temperature 75°C. Flow rate 1.5 mL.min<sup>-1</sup>. λ 260 nm.*

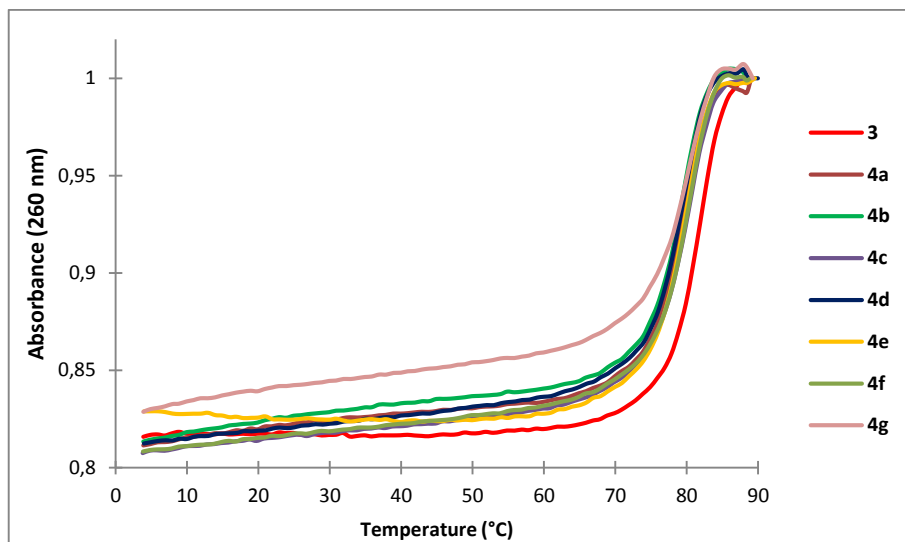

**Figure S16:** Melting curves of RNAs **3** and **4a-g** with their complementary strand

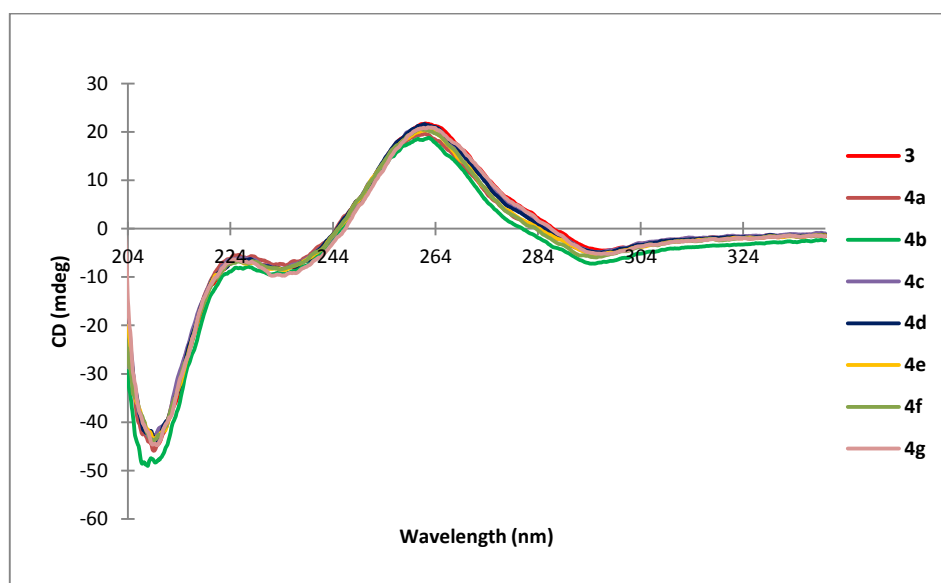

**Figure S17:** CD spectroscopy curves of RNAs **3** and **4a-g** with their complementary strand

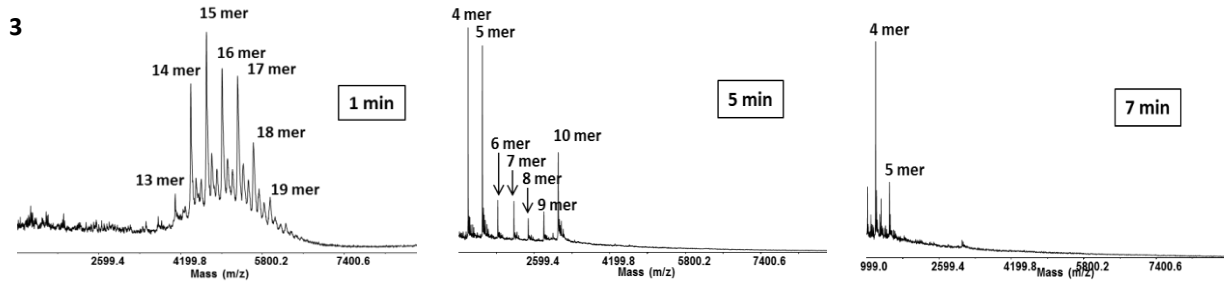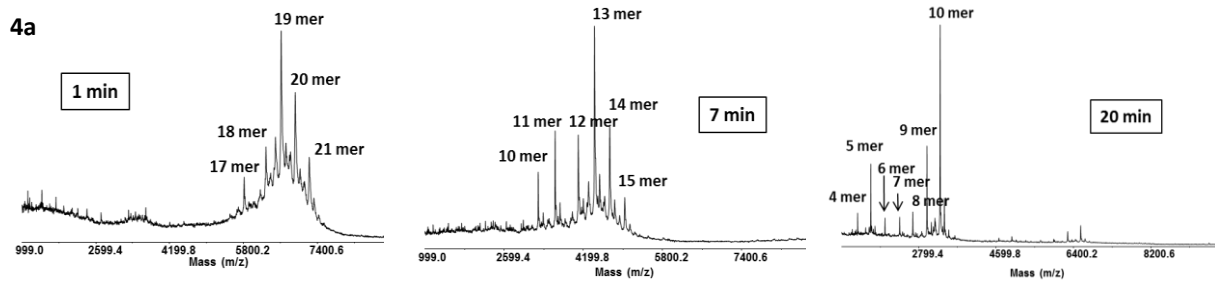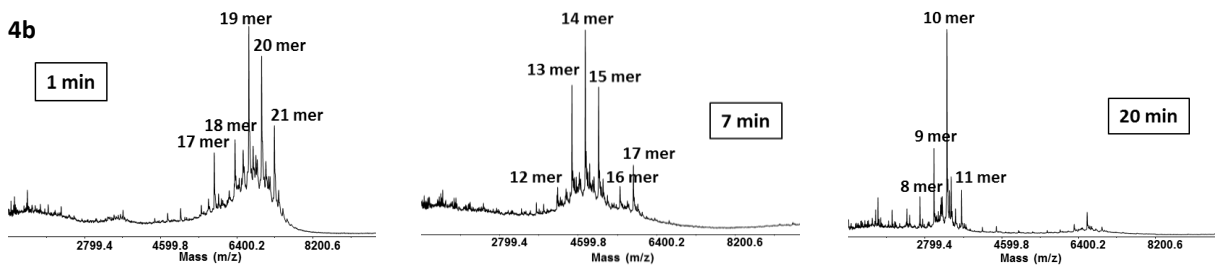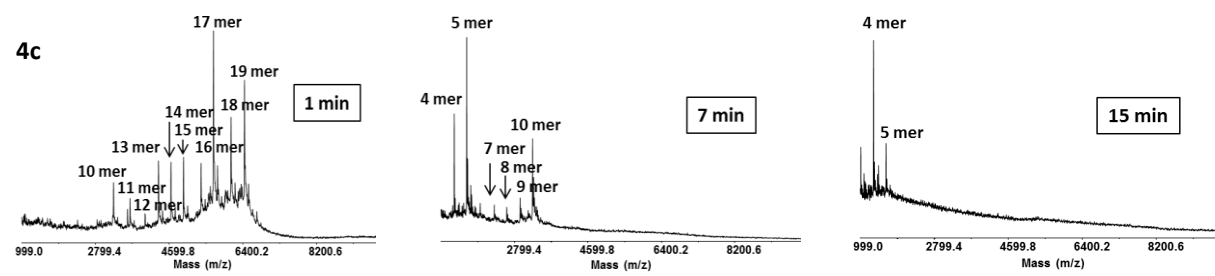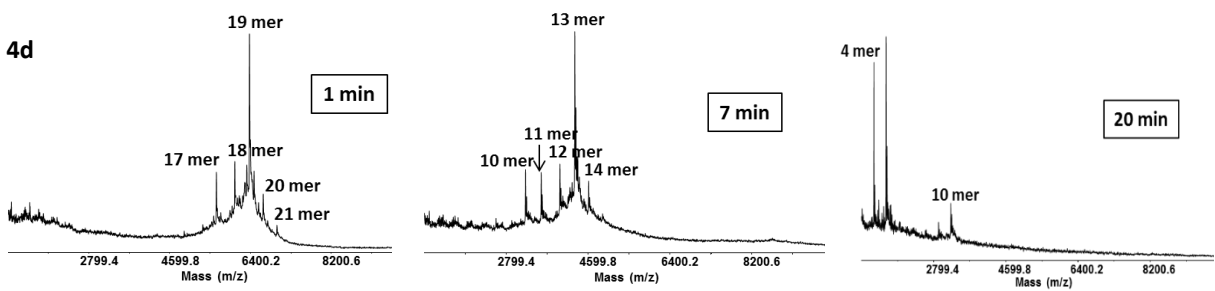

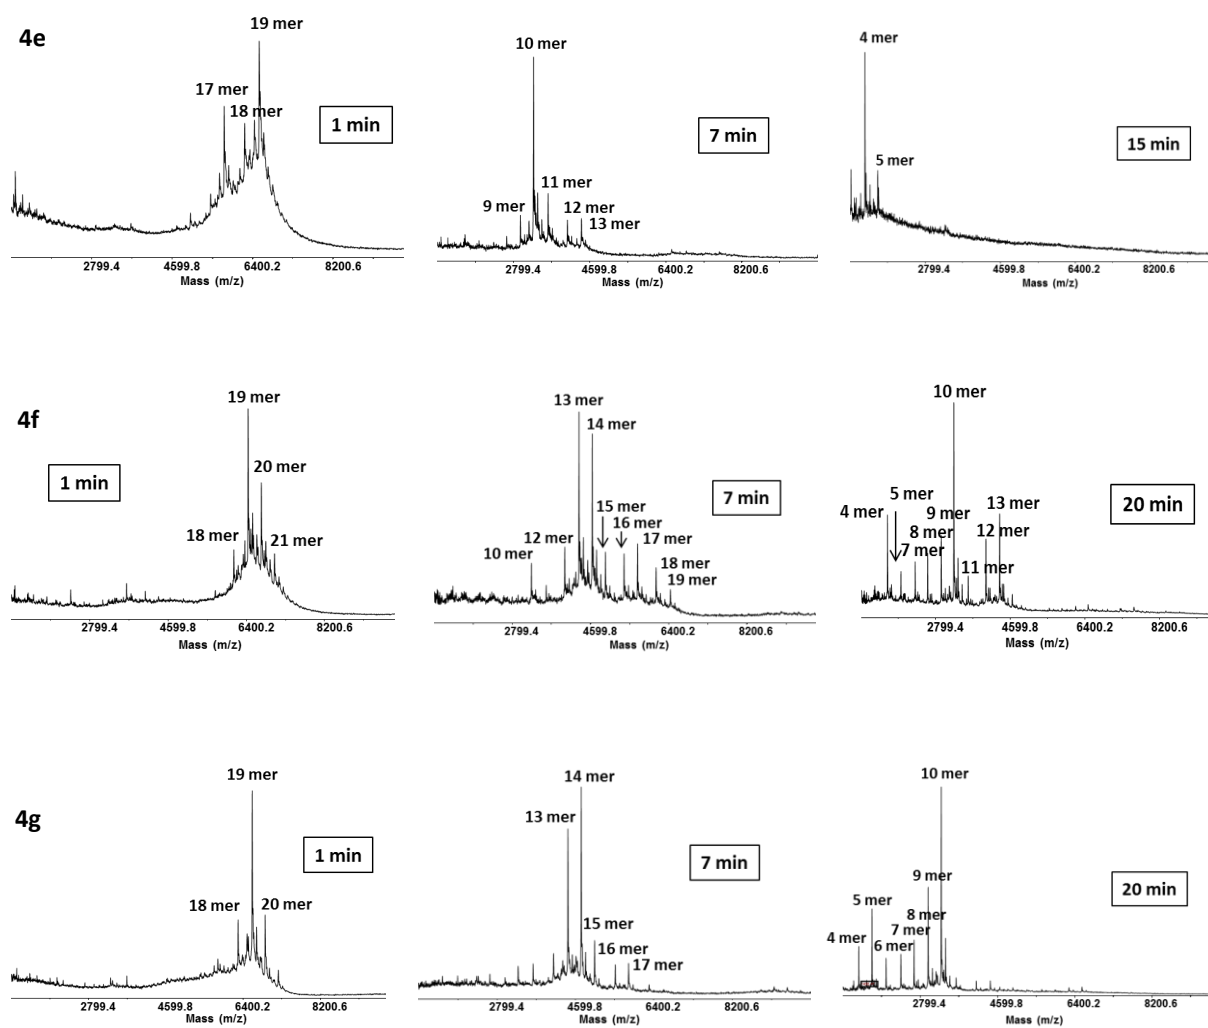

**Figure S18:** MALDI-TOF MS spectra of RNAs **3** and **4a-g** incubated with SVPDE

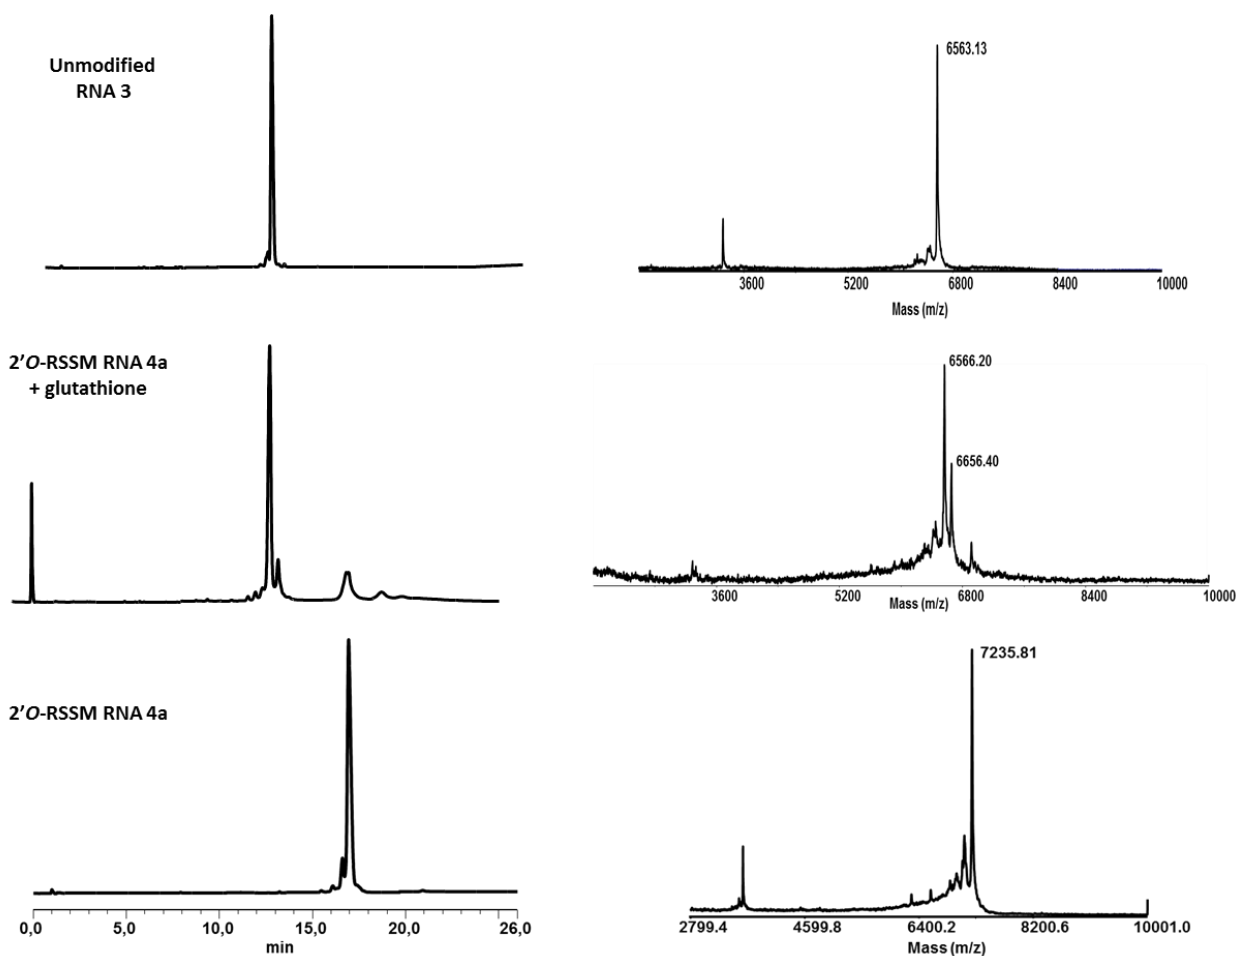

**Figure S19** : IEX-HPLC and MALDI-TOF Mass spectra of reductive conversion of RNAs **4a** into unmodified RNA **3** after 1h incubation with 5.6 mM glutathione

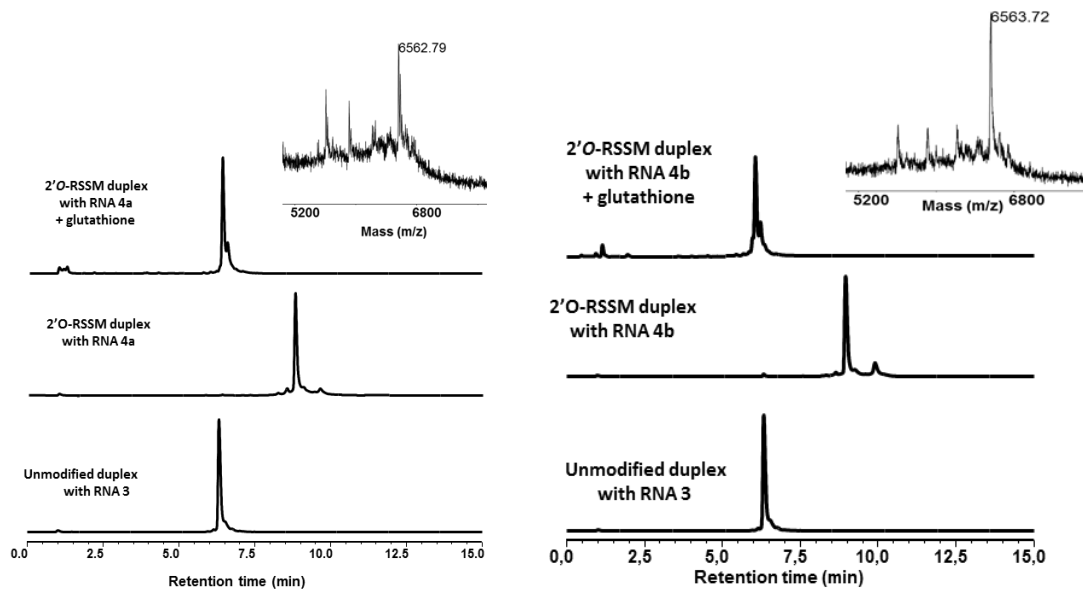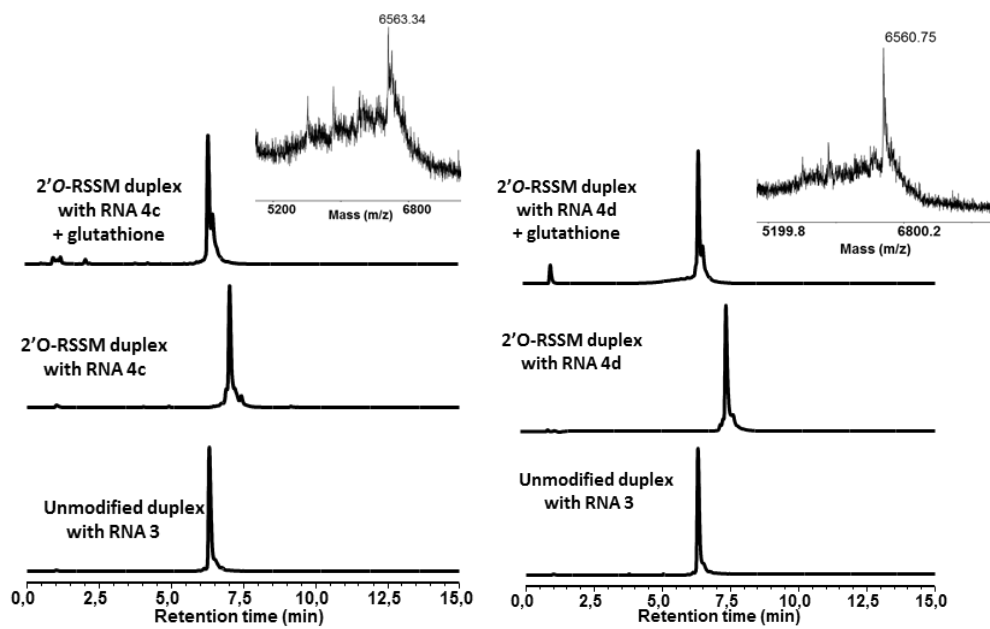

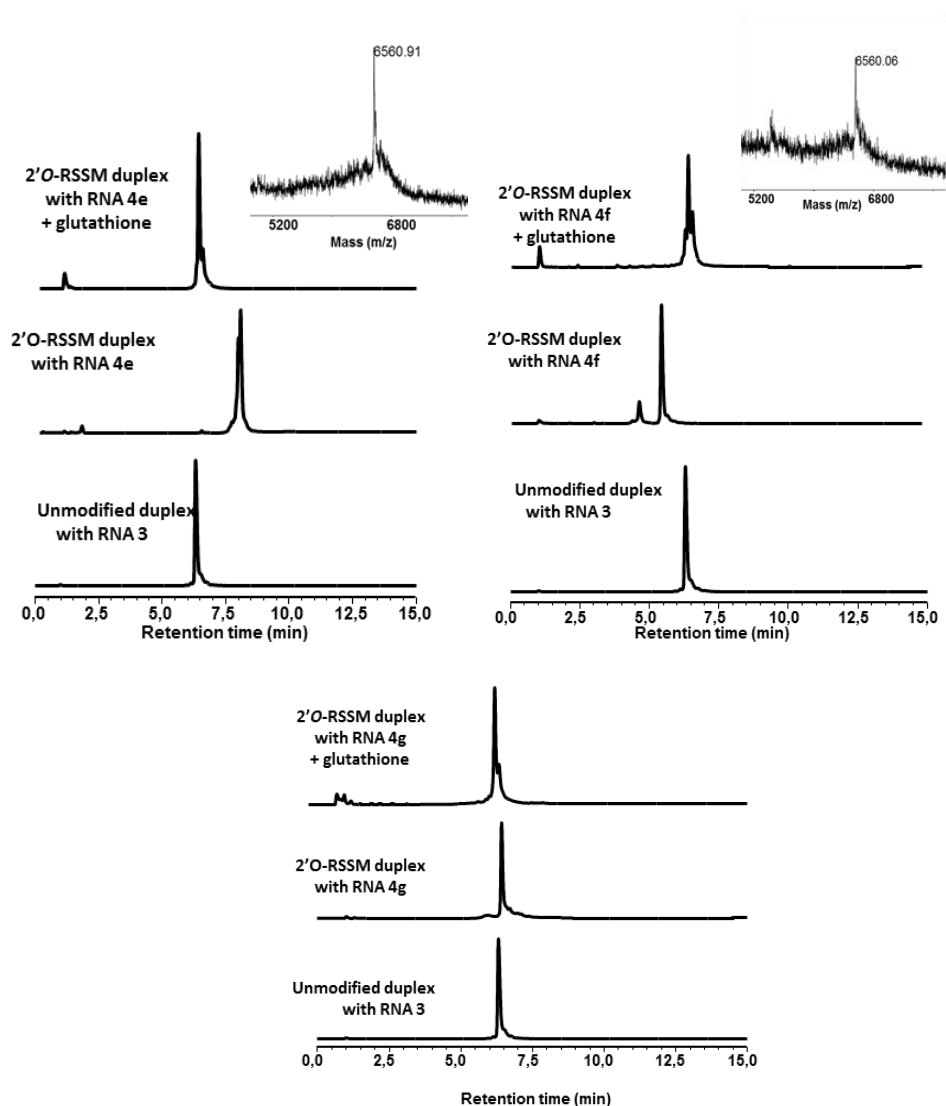

**Figure S20 :** IEX-HPLC and MALDI-TOF Mass spectra of reductive conversion of RNAs **4a-g** with their complementary strand into unmodified duplex after 1h incubation with 5.6 mM glutathione

| 2'-O-RSSM RNA duplexes | Purity of products RNAs |
|------------------------|-------------------------|
| <b>4a</b>              | 94%                     |
| <b>4b</b>              | 85%                     |
| <b>4c</b>              | 92%                     |
| <b>4d</b>              | 94%                     |
| <b>4e</b>              | 95%                     |
| <b>4f</b>              | 70%                     |
| <b>4g</b>              | 93%                     |

**Table S1 :** Purity of the product 2'-OH RNAs duplex after reductive conversion of RNAs **4a-g** with their complementary strand into unmodified duplex after 1h incubation with 5.6 mM glutathione
